# Supplementary material
Source: ML conference proceedings conference paper supplement (https://openaccess.thecvf.com/content/ICCV2023/html/Raychaudhuri_Prior-guided_Source-free_Domain_ICCV_2023_paper.html)
Supplement: Supplementary file 1 [file Raychaudhuri_Prior-guided_Source-free_Domain_ICCV_2023_supplemental.pdf]

# Supplementary Document for Prior-guided Source-free Domain Adaptation for Human Pose Estimation

Dripta S. Raychaudhuri<sup>1,2\*</sup> Calvin-Khang Ta<sup>1</sup> Arindam Dutta<sup>1</sup> Rohit Lal<sup>1</sup> Amit K. Roy-Chowdhury<sup>1</sup>

<sup>1</sup>University of California, Riverside      <sup>2</sup>AWS AI Labs

{drayc001@, cta003@, adutt020@, rlal011@, amitrc@ece.}ucr.edu

## A. Processing auxiliary dataset

In the experiment section of the main paper, we briefly described how to process the auxiliary dataset  $\mathcal{D}_A$  to train the prior. Specifically, we generated a set of both plausible and implausible poses and calculated the corresponding distance values from the pose manifold  $\tilde{\mathcal{D}} = \{(\theta_i, d_i)\}_{i=1}^M$ .

For poses derived from the auxiliary dataset, we label them as plausible poses and assign a distance value of  $d = 0$ . To generate an implausible pose  $\theta_{nm}$ , we first randomly sample a pose  $\theta_m \sim \mathcal{D}_A$  and convert the sampled pose to polar coordinates,

$$\begin{aligned} u_1 &= \arccos(\theta_m^1) \\ u_2 &= \arcsin(\theta_m^2). \end{aligned}$$

Next, we sample noise from the Von-Mises distribution,

$$n_1, n_2 \sim f(n|\mu, \kappa) \quad \text{where } f(n|\mu, \kappa) = \frac{\exp(\kappa \cos(n - \mu))}{2\pi I_0(\kappa)},$$

and add it to the coordinates to obtain the new pose  $\theta_{nm}$ ,

$$\begin{aligned} \theta_{nm}^1 &= \cos(u_1 + n_1) \\ \theta_{nm}^2 &= \sin(u_2 + n_2). \end{aligned}$$

In our experiments we set  $\mu = 0$  and sample  $\kappa$  randomly from the set  $\{2, 4, 8\}$ .

We employ the nearest neighbor strategy described in [1] to assign a distance value to each synthetically generated pose. To accomplish this, we first use FAISS [2] and L2 distances to approximate the  $k'$  nearest neighbors of the pose from the set of clean poses. From these neighbors, we identify the exact  $k$  nearest ones. In our approach, we set  $k' = 500$  and  $k = 5$ . Finally, we determine the ground truth distance by calculating the average of the  $k$  smallest distances.

## B. Qualitative results

We present additional visual results on the SURREAL→BRIAR scenario in Figure A-1. Although our approach does not use any source data for adaptation, it is able to match the predictions produced by UDAPE [3], which uses source data.

## References

- [1] Garvita Tiwari, Dimitrije Antic, Jan Eric Lenssen, Nikolaos Sarafianos, Tony Tung, and Gerard Pons-Moll. Pose-ndf: Modeling human pose manifolds with neural distance fields. In *ECCV*, 2022. A-1
- [2] Jeff Johnson, Matthijs Douze, and Hervé Jégou. Billion-scale similarity search with GPUs. *IEEE Transactions on Big Data*, 7(3):535–547, 2019. A-1
- [3] Donghyun Kim, Kaihong Wang, Kate Saenko, Margrit Betke, and Stan Sclaroff. A unified framework for domain adaptive pose estimation. In *ECCV*, 2022. A-1, A-2

\* Currently at AWS AI Labs. Work done while the author was at UCR.

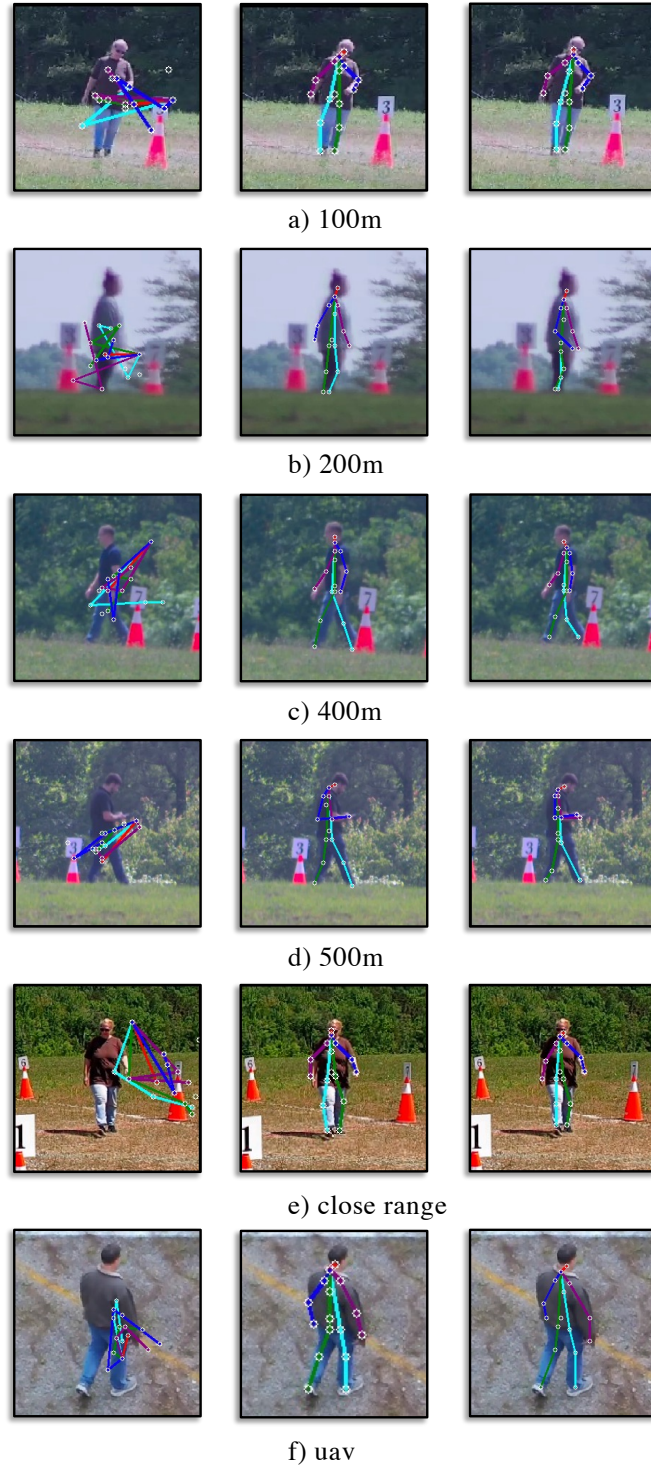

Figure A-1. **Qualitative results on SURREAL  $\rightarrow$  BRIAR.** We demonstrate sample results on the BRIAR dataset at all ranges. For each range, we display three images: the leftmost shows the *Source only* prediction, the middle one shows the *UDAPE* [3] prediction, and the rightmost shows the prediction made by our framework.
